# Supplementary material for: Chromosome-level genome assembly and annotation of the Antarctica whitefin plunderfish Pogonophryne albipinna
Source: PubMed Central journal article supplement (PMC10716251; doi:10.1038/s41597-023-02811-x), 2023-12-12
Supplement: 41597_2023_2811_MOESM1_ESM.pdf [file 41597_2023_2811_MOESM1_ESM.pdf]

## Supplementary Information

### **Chromosome-level genome assembly and annotation of the whitefin plunderfish *Pogonophryne albipinna***

Euna Jo<sup>1,2,†</sup>, Soyun Choi<sup>1,†</sup>, Seung Jae Lee<sup>1</sup>, Jinmu Kim<sup>1</sup>, Eun Kyung Choi<sup>1</sup>, Minjoo Cho<sup>1</sup>, Jangyeon Kim<sup>1</sup>, Sangdeok Chung<sup>3</sup>, Jaebong Lee<sup>3</sup>, Jeong-Hoon Kim<sup>2</sup> and Hyun Park<sup>1,\*</sup>

<sup>1</sup> Department of Biotechnology, College of Life Sciences and Biotechnology, Korea University, Seoul 02841, Korea

<sup>2</sup> Division of Life Sciences, Korea Polar Research Institute (KOPRI), Incheon 21990, Korea

<sup>3</sup> National Institute of Fisheries Science (NIFS), Busan, 46083 Korea

<sup>†</sup>These authors contributed equally to this work.

\*Corresponding author: Hyun Park (hpark@korea.ac.kr)

#### **Table of Contents**

**Table S1.** Species information used in the orthologous gene family analysis.

**Table S2.** Summary of gene families of *Pogonophryne albipinna* and other fish species.

**Table S3.** Gene Ontology of expanded gene families in the *Pogonophryne albipinna* genome among 17 fish species.

**Table S4.** Gene Ontology of contracted gene families in the *Pogonophryne albipinna* genome among 17 fish species.

**Table S5.** Gene Ontology of *Pogonophryne albipinna*-specific gene families among six Antarctic fish species.

**Table S1.** Species information used in the orthologous gene family analysis.

| <b>Common name</b>          | <b>Species</b>                   | <b>Assembly</b>          |
|-----------------------------|----------------------------------|--------------------------|
| Whitefin plunderfish        | <i>Pogonophryne albipinna</i>    | This study               |
| Pachon cavefish             | <i>Astyanax mexicanus</i>        | Astyanax_mexicanus-1.0.2 |
| Blackfin icefish            | <i>Chaenocephalus aceratus</i>   | Kim et al., 2019*        |
| Atlantic herring            | <i>Clupea harengus</i>           | Ch_v2.0.2                |
| Zebrafish                   | <i>Danio rerio</i>               | GRCz11                   |
| Antarctic toothfish         | <i>Dissostichus mawsoni</i>      | GCA_011823955.1          |
| Atlantic cod                | <i>Gadus morhua</i>              | gadMor1                  |
| Stickleback                 | <i>Gasterosteus aculeatus</i>    | BROAD S1                 |
| Coelacanth                  | <i>Latimeria chalumnae</i>       | LatCha1                  |
| Antarctic bullhead notothen | <i>Notothenia coriiceps</i>      | GCA_000735185.1          |
| Nile tilapia                | <i>Oreochromis niloticus</i>     | O_niloticus_UMD_NMBU     |
| Japanese medaka HNI         | <i>Oryzias latipes</i>           | ASM223471v1              |
| Antarctic dragonfish        | <i>Parachaenichthys charcoti</i> | Ahn et al., 2017**       |
| Amazon molly                | <i>Poecilia formosa</i>          | Poecilia_formosa-5.1.2   |
| Fugu                        | <i>Takifugu rubripes</i>         | fTakRub1.2               |
| Antarctic scaly rockcod     | <i>Trematomus loennbergii</i>    | GCA_012861695.1          |
| Platyfish                   | <i>Xiphophorus maculatus</i>     | X_maculatus-5.0-male     |

\* Kim et al., 2019, Nature Ecology & Evolution, 3, 469–478.

\*\* Ahn et al., 2017, GigaScience, 6, gix060.

1 **Table S2.** Summary of gene families of *Pogonophryne albipinna* and other fish species.

|                       | Number of genes | Number of genes in orthogroups | Number of unassigned genes | Percentage of genes in orthogroups | Percentage of unassigned genes | Number of orthogroups containing species | Percentage of orthogroups containing species | Number of species-specific orthogroups | Number of genes in species-specific orthogroups | Percentage of genes in species-specific orthogroups |
|-----------------------|-----------------|--------------------------------|----------------------------|------------------------------------|--------------------------------|------------------------------------------|----------------------------------------------|----------------------------------------|-------------------------------------------------|-----------------------------------------------------|
| <i>P. albipinna</i>   | 31,128          | 28,247                         | 2,881                      | 90.7                               | 9.3                            | 15,920                                   | 63.1                                         | 186                                    | 766                                             | 2.5                                                 |
| <i>C. aceratus</i>    | 30,773          | 28,780                         | 1,993                      | 93.5                               | 6.5                            | 17,112                                   | 67.9                                         | 136                                    | 399                                             | 1.3                                                 |
| <i>D. mawsoni</i>     | 32,914          | 30,055                         | 2,859                      | 91.3                               | 8.7                            | 16,907                                   | 67.1                                         | 320                                    | 996                                             | 3.0                                                 |
| <i>N. coriiceps</i>   | 32,661          | 29,475                         | 3,186                      | 90.2                               | 9.8                            | 18,185                                   | 72.1                                         | 86                                     | 205                                             | 0.6                                                 |
| <i>P. charcoti</i>    | 32,713          | 31,686                         | 1,027                      | 96.9                               | 3.1                            | 18,458                                   | 73.2                                         | 72                                     | 368                                             | 1.1                                                 |
| <i>T. loennbergii</i> | 29,163          | 28,012                         | 1,151                      | 96.1                               | 3.9                            | 15,164                                   | 60.1                                         | 159                                    | 537                                             | 1.8                                                 |
| <i>A. mexicanus</i>   | 26,698          | 25,361                         | 1,337                      | 95.0                               | 5.0                            | 15,214                                   | 60.3                                         | 149                                    | 728                                             | 2.7                                                 |
| <i>C. harengus</i>    | 24,095          | 23,341                         | 754                        | 96.9                               | 3.1                            | 14,156                                   | 56.1                                         | 119                                    | 512                                             | 2.1                                                 |
| <i>D. rerio</i>       | 30,313          | 29,448                         | 865                        | 97.1                               | 2.9                            | 14,906                                   | 59.1                                         | 213                                    | 1,803                                           | 5.9                                                 |
| <i>G. morhua</i>      | 20,095          | 19,518                         | 577                        | 97.1                               | 2.9                            | 13,679                                   | 54.3                                         | 16                                     | 40                                              | 0.2                                                 |
| <i>G. aculeatus</i>   | 20,787          | 20,231                         | 556                        | 97.3                               | 2.7                            | 13,879                                   | 55.0                                         | 15                                     | 44                                              | 0.2                                                 |
| <i>L. chalumnae</i>   | 19,569          | 18,923                         | 646                        | 96.7                               | 3.3                            | 13,090                                   | 51.9                                         | 126                                    | 887                                             | 4.5                                                 |
| <i>O. niloticus</i>   | 28,189          | 27,607                         | 582                        | 97.9                               | 2.1                            | 15,056                                   | 59.7                                         | 143                                    | 1,157                                           | 4.1                                                 |
| <i>O. latipes</i>     | 22,127          | 21,483                         | 644                        | 97.1                               | 2.9                            | 14,239                                   | 56.5                                         | 41                                     | 311                                             | 1.4                                                 |
| <i>P. formosa</i>     | 23,615          | 23,443                         | 172                        | 99.3                               | 0.7                            | 14,924                                   | 59.2                                         | 25                                     | 75                                              | 0.3                                                 |
| <i>T. rubripes</i>    | 21,411          | 20,789                         | 622                        | 97.1                               | 2.9                            | 13,833                                   | 54.9                                         | 58                                     | 258                                             | 1.2                                                 |
| <i>X. maculatus</i>   | 23,774          | 23,258                         | 516                        | 97.8                               | 2.2                            | 14,993                                   | 59.5                                         | 36                                     | 159                                             | 0.7                                                 |

2

**Table S3.** Gene Ontology of expanded gene families in the *Pogonophryne albipinna* genome among 17 fish species.

| Category           | GO ID      | GO name                                                                            | No. genes | P-value  |
|--------------------|------------|------------------------------------------------------------------------------------|-----------|----------|
| Biological process | GO:0090305 | nucleic acid phosphodiester bond hydrolysis                                        | 88        | 7.90E-23 |
|                    | GO:0032212 | positive regulation of telomere maintenance via telomerase                         | 16        | 3.18E-15 |
|                    | GO:0051781 | positive regulation of cell division                                               | 27        | 4.38E-15 |
|                    | GO:0051673 | perturbation of plasma membrane integrity in another organism                      | 16        | 1.84E-14 |
|                    | GO:0050830 | defense response to Gram-positive bacterium                                        | 16        | 1.08E-12 |
|                    | GO:0006888 | endoplasmic reticulum to Golgi vesicle-mediated transport                          | 30        | 8.89E-12 |
|                    | GO:1904908 | negative regulation of maintenance of mitotic sister chromatid cohesion, telomeric | 10        | 4.23E-11 |
|                    | GO:0051973 | positive regulation of telomerase activity                                         | 10        | 4.23E-11 |
|                    | GO:1904355 | positive regulation of telomere capping                                            | 10        | 4.23E-11 |
|                    | GO:0070198 | protein localization to chromosome, telomeric region                               | 10        | 4.23E-11 |
|                    | GO:0070212 | protein poly-ADP-ribosylation                                                      | 10        | 4.23E-11 |
|                    | GO:0070213 | protein auto-ADP-ribosylation                                                      | 10        | 4.23E-11 |
|                    | GO:1904743 | negative regulation of telomeric DNA binding                                       | 10        | 4.23E-11 |
|                    | GO:1904357 | negative regulation of telomere maintenance via telomere lengthening               | 10        | 4.27E-10 |
|                    | GO:0006897 | endocytosis                                                                        | 54        | 1.98E-09 |
|                    | GO:0051225 | spindle assembly                                                                   | 16        | 1.84E-08 |
|                    | GO:0018107 | peptidyl-threonine phosphorylation                                                 | 10        | 2.99E-08 |
|                    | GO:2000178 | negative regulation of neural precursor cell proliferation                         | 8         | 4.17E-08 |
|                    | GO:0035821 | modulation of process of another organism                                          | 7         | 1.67E-06 |
|                    | GO:0042593 | glucose homeostasis                                                                | 14        | 1.78E-05 |
|                    | GO:0018105 | peptidyl-serine phosphorylation                                                    | 10        | 3.78E-05 |
|                    | GO:0006334 | nucleosome assembly                                                                | 11        | 4.04E-05 |
|                    | GO:0045087 | innate immune response                                                             | 24        | 5.09E-05 |
|                    | GO:0021628 | olfactory nerve formation                                                          | 4         | 7.12E-05 |
|                    | GO:0090263 | positive regulation of canonical Wnt signaling pathway                             | 10        | 8.22E-05 |
|                    | GO:0032508 | DNA duplex unwinding                                                               | 19        | 9.06E-05 |
|                    | GO:0044179 | hemolysis in another organism                                                      | 7         | 2.97E-04 |
|                    | GO:0071699 | olfactory placode morphogenesis                                                    | 4         | 3.30E-04 |
|                    | GO:0007052 | mitotic spindle organization                                                       | 10        | 4.10E-04 |
|                    | GO:0015671 | oxygen transport                                                                   | 7         | 4.66E-04 |

|                    |            |                                                                                                                                                                                             |    |          |
|--------------------|------------|---------------------------------------------------------------------------------------------------------------------------------------------------------------------------------------------|----|----------|
|                    | GO:0043066 | negative regulation of apoptotic process                                                                                                                                                    | 18 | 7.16E-04 |
|                    | GO:1902340 | negative regulation of chromosome condensation                                                                                                                                              | 3  | 7.75E-04 |
|                    | GO:0090230 | regulation of centromere complex assembly                                                                                                                                                   | 3  | 7.75E-04 |
|                    | GO:0007566 | embryo implantation                                                                                                                                                                         | 3  | 7.75E-04 |
|                    | GO:0048484 | enteric nervous system development                                                                                                                                                          | 8  | 1.73E-03 |
|                    | GO:0030901 | midbrain development                                                                                                                                                                        | 8  | 1.73E-03 |
|                    | GO:1900748 | positive regulation of vascular endothelial growth factor signaling pathway                                                                                                                 | 4  | 1.98E-03 |
|                    | GO:0031509 | subtelomeric heterochromatin formation                                                                                                                                                      | 3  | 2.89E-03 |
|                    | GO:0031508 | pericentric heterochromatin formation                                                                                                                                                       | 3  | 2.89E-03 |
|                    | GO:0007140 | male meiotic nuclear division                                                                                                                                                               | 3  | 2.89E-03 |
|                    | GO:0070374 | positive regulation of ERK1 and ERK2 cascade                                                                                                                                                | 4  | 6.14E-03 |
|                    | GO:0016024 | CDP-diacylglycerol biosynthetic process                                                                                                                                                     | 5  | 6.44E-03 |
|                    | GO:0017038 | protein import                                                                                                                                                                              | 3  | 6.72E-03 |
|                    | GO:0000209 | protein polyubiquitination                                                                                                                                                                  | 10 | 6.74E-03 |
|                    | GO:0008584 | male gonad development                                                                                                                                                                      | 3  | 6.72E-03 |
|                    | GO:0006308 | DNA catabolic process                                                                                                                                                                       | 5  | 8.93E-03 |
|                    | GO:0090090 | negative regulation of canonical Wnt signaling pathway                                                                                                                                      | 8  | 1.24E-02 |
|                    | GO:0007156 | homophilic cell adhesion via plasma membrane adhesion molecules                                                                                                                             | 23 | 1.96E-02 |
|                    | GO:0009253 | peptidoglycan catabolic process                                                                                                                                                             | 3  | 2.04E-02 |
|                    | GO:0007286 | spermatid development                                                                                                                                                                       | 3  | 2.04E-02 |
|                    | GO:0035264 | multicellular organism growth                                                                                                                                                               | 3  | 4.27E-02 |
|                    | GO:0051028 | mRNA transport                                                                                                                                                                              | 9  | 4.11E-02 |
|                    | GO:0045893 | positive regulation of DNA-templated transcription                                                                                                                                          | 29 | 3.09E-02 |
|                    | GO:0051492 | regulation of stress fiber assembly                                                                                                                                                         | 4  | 2.59E-02 |
| Molecular function | GO:0097020 | COPII receptor activity                                                                                                                                                                     | 30 | 1.95E-30 |
|                    | GO:0005200 | structural constituent of cytoskeleton                                                                                                                                                      | 35 | 2.21E-21 |
|                    | GO:0042393 | histone binding                                                                                                                                                                             | 28 | 4.84E-15 |
|                    | GO:0002039 | p53 binding                                                                                                                                                                                 | 18 | 1.63E-14 |
|                    | GO:0016712 | oxidoreductase activity, acting on paired donors, with incorporation or reduction of molecular oxygen, reduced flavin or flavoprotein as one donor, and incorporation of one atom of oxygen | 23 | 3.90E-13 |
|                    | GO:0020037 | heme binding                                                                                                                                                                                | 44 | 4.92E-12 |
|                    | GO:0046982 | protein heterodimerization activity                                                                                                                                                         | 38 | 5.86E-12 |

|                    |            |                                                               |    |          |
|--------------------|------------|---------------------------------------------------------------|----|----------|
|                    | GO:0004499 | N,N-dimethylaniline monooxygenase activity                    | 11 | 4.26E-11 |
|                    | GO:0106294 | NADPH oxidase H2O2-forming activity                           | 11 | 4.26E-11 |
|                    | GO:0008201 | heparin binding                                               | 27 | 2.90E-10 |
|                    | GO:1990404 | NAD+-protein ADP-ribosyltransferase activity                  | 10 | 9.33E-09 |
|                    | GO:0005044 | scavenger receptor activity                                   | 24 | 1.20E-08 |
|                    | GO:0008013 | beta-catenin binding                                          | 18 | 6.94E-08 |
|                    | GO:0003950 | NAD+ ADP-ribosyltransferase activity                          | 16 | 1.19E-07 |
|                    | GO:0090729 | toxin activity                                                | 7  | 4.04E-07 |
|                    | GO:0005506 | iron ion binding                                              | 36 | 5.74E-07 |
|                    | GO:0004803 | transposase activity                                          | 9  | 2.90E-06 |
|                    | GO:0008821 | crossover junction DNA endonuclease activity                  | 5  | 6.53E-06 |
|                    | GO:0140658 | ATP-dependent chromatin remodeler activity                    | 18 | 7.33E-06 |
|                    | GO:0050661 | NADP binding                                                  | 12 | 1.38E-05 |
|                    | GO:0003964 | RNA-directed DNA polymerase activity                          | 8  | 3.29E-05 |
|                    | GO:0003678 | DNA helicase activity                                         | 19 | 6.27E-05 |
|                    | GO:0048306 | calcium-dependent protein binding                             | 7  | 1.82E-04 |
|                    | GO:0000979 | RNA polymerase II core promoter sequence-specific DNA binding | 4  | 3.30E-04 |
|                    | GO:0005344 | oxygen carrier activity                                       | 7  | 4.66E-04 |
|                    | GO:0019825 | oxygen binding                                                | 7  | 4.66E-04 |
|                    | GO:0008083 | growth factor activity                                        | 27 | 4.77E-04 |
|                    | GO:0098770 | FBXO family protein binding                                   | 3  | 7.75E-04 |
|                    | GO:0005525 | GTP binding                                                   | 72 | 7.61E-04 |
|                    | GO:0030527 | structural constituent of chromatin                           | 3  | 7.75E-04 |
|                    | GO:0005219 | ryanodine-sensitive calcium-release channel activity          | 5  | 1.88E-03 |
|                    | GO:0008146 | sulfotransferase activity                                     | 15 | 2.33E-03 |
|                    | GO:0031492 | nucleosomal DNA binding                                       | 4  | 3.68E-03 |
|                    | GO:0004605 | phosphatidate cytidyltransferase activity                     | 5  | 4.47E-03 |
|                    | GO:0003796 | lysozyme activity                                             | 3  | 6.72E-03 |
|                    | GO:0004634 | phosphopyruvate hydratase activity                            | 4  | 1.38E-02 |
| Cellular component | GO:0000786 | nucleosome                                                    | 38 | 1.73E-22 |
|                    | GO:0000242 | pericentriolar material                                       | 10 | 4.23E-11 |
|                    | GO:0071339 | MLL1 complex                                                  | 18 | 5.56E-11 |
|                    | GO:0097431 | mitotic spindle pole                                          | 10 | 4.27E-10 |
|                    | GO:0000781 | chromosome, telomeric region                                  | 13 | 8.65E-07 |
|                    | GO:0016529 | sarcoplasmic reticulum                                        | 14 | 6.87E-06 |
|                    | GO:0005833 | hemoglobin complex                                            | 7  | 5.72E-05 |
|                    | GO:0005874 | microtubule                                                   | 38 | 2.83E-04 |
|                    | GO:0000791 | euchromatin                                                   | 4  | 3.30E-04 |
|                    | GO:0001740 | Barr body                                                     | 3  | 7.75E-04 |
|                    | GO:0005700 | polytene chromosome                                           | 3  | 7.75E-04 |
|                    | GO:0000939 | inner kinetochore                                             | 3  | 6.72E-03 |
|                    | GO:0005643 | nuclear pore                                                  | 10 | 6.74E-03 |

|  |            |                                   |   |          |
|--|------------|-----------------------------------|---|----------|
|  | GO:0070062 | extracellular exosome             | 3 | 1.25E-02 |
|  | GO:0000015 | phosphopyruvate hydratase complex | 4 | 1.38E-02 |
|  | GO:0005637 | nuclear inner membrane            | 4 | 3.36E-02 |

**Table S4.** Gene Ontology of contracted gene families in the *Pogonophryne albipinna* genome among 17 fish species.

| Category           | GO ID      | GO name                                                                | No. genes | P-value  |
|--------------------|------------|------------------------------------------------------------------------|-----------|----------|
| Biological process | GO:0050911 | detection of chemical stimulus involved in sensory perception of smell | 2         | 3.01E-04 |
|                    | GO:0030259 | lipid glycosylation                                                    | 1         | 3.02E-02 |
|                    | GO:0051209 | release of sequestered calcium ion into cytosol                        | 2         | 4.11E-03 |
|                    | GO:0009452 | 7-methylguanosine RNA capping                                          | 1         | 3.02E-02 |
| Molecular function | GO:0015020 | glucuronosyltransferase activity                                       | 3         | 5.05E-05 |
|                    | GO:0004984 | olfactory receptor activity                                            | 2         | 3.01E-04 |
|                    | GO:0005219 | ryanodine-sensitive calcium-release channel activity                   | 2         | 7.80E-04 |
|                    | GO:0030246 | carbohydrate binding                                                   | 3         | 2.33E-02 |
|                    | GO:0001594 | trace-amine receptor activity                                          | 1         | 3.82E-03 |
|                    | GO:0005516 | calmodulin binding                                                     | 3         | 6.74E-03 |
|                    | GO:0005540 | hyaluronic acid binding                                                | 2         | 4.11E-03 |
|                    | GO:0008307 | structural constituent of muscle                                       | 1         | 1.14E-02 |
| Cellular component | GO:0033017 | sarcoplasmic reticulum membrane                                        | 3         | 1.04E-04 |
|                    | GO:0034993 | meiotic nuclear membrane microtubule tethering complex                 | 2         | 3.01E-04 |
|                    | GO:0001527 | microfibril                                                            | 1         | 1.14E-02 |
|                    | GO:0005640 | nuclear outer membrane                                                 | 1         | 2.65E-02 |
|                    | GO:0005923 | bicellular tight junction                                              | 2         | 2.36E-02 |



**Table S5.** Gene Ontology of *Pogonophryne albipinna*-specific gene families among six Antarctic fish species.

| Category           | GO ID      | GO name                                                                | No. genes | P-value  |
|--------------------|------------|------------------------------------------------------------------------|-----------|----------|
| Biological process | GO:0006313 | DNA transposition                                                      | 117       | 1.22E-70 |
|                    | GO:0015074 | DNA integration                                                        | 112       | 6.15E-63 |
|                    | GO:0006278 | RNA-templated DNA biosynthetic process                                 | 6         | 1.08E-03 |
|                    | GO:0060134 | prepulse inhibition                                                    | 1         | 3.41E-02 |
|                    | GO:0050830 | defense response to Gram-positive bacterium                            | 4         | 6.04E-03 |
|                    | GO:0090305 | nucleic acid phosphodiester bond hydrolysis                            | 20        | 4.51E-03 |
|                    | GO:1901537 | positive regulation of DNA demethylation                               | 1         | 3.41E-02 |
|                    | GO:0034316 | negative regulation of Arp2/3 complex-mediated actin nucleation        | 1         | 3.41E-02 |
|                    | GO:0034080 | CENP-A containing chromatin assembly                                   | 1         | 3.41E-02 |
|                    | GO:0050911 | detection of chemical stimulus involved in sensory perception of smell | 2         | 2.18E-02 |
|                    | GO:0106300 | protein-DNA covalent cross-linking repair                              | 1         | 3.41E-02 |
|                    | GO:0034154 | toll-like receptor 7 signaling pathway                                 | 1         | 3.41E-02 |
|                    | GO:0051673 | perturbation of plasma membrane integrity in another organism          | 4         | 3.47E-03 |
|                    | GO:0021942 | radial glia guided migration of Purkinje cell                          | 1         | 3.41E-02 |
|                    | GO:0070537 | histone H2A K63-linked deubiquitination                                | 1         | 3.41E-02 |
| Molecular function | GO:0003677 | DNA binding                                                            | 146       | 2.24E-15 |
|                    | GO:0003964 | RNA-directed DNA polymerase activity                                   | 6         | 9.31E-06 |
|                    | GO:0035615 | clathrin adaptor activity                                              | 5         | 1.46E-04 |
|                    | GO:0004803 | transposase activity                                                   | 5         | 1.46E-04 |
|                    | GO:0017128 | phospholipid scramblase activity                                       | 2         | 1.59E-02 |
|                    | GO:0031386 | protein tag                                                            | 2         | 1.59E-02 |
|                    | GO:0004518 | nuclease activity                                                      | 20        | 1.17E-02 |
|                    | GO:0004984 | olfactory receptor activity                                            | 2         | 2.18E-02 |
|                    | GO:0004965 | G protein-coupled GABA receptor activity                               | 2         | 4.37E-02 |
|                    | GO:0002020 | protease binding                                                       | 2         | 2.84E-02 |
|                    | GO:0008273 | calcium, potassium:sodium antiporter activity                          | 2         | 1.59E-02 |
|                    | GO:0000062 | fatty-acyl-CoA binding                                                 | 3         | 1.09E-02 |
|                    | GO:0046982 | protein heterodimerization activity                                    | 11        | 2.92E-03 |
| Cellular component | GO:0000786 | nucleosome                                                             | 13        | 3.64E-07 |
|                    | GO:0030121 | AP-1 adaptor complex                                                   | 5         | 2.98E-05 |
|                    | GO:0031315 | extrinsic component of mitochondrial outer membrane                    | 2         | 1.16E-03 |
|                    | GO:1902711 | GABA-A receptor complex                                                | 2         | 3.57E-02 |

|  |            |                                |   |          |
|--|------------|--------------------------------|---|----------|
|  | GO:0009706 | chloroplast inner membrane     | 1 | 3.41E-02 |
|  | GO:1990221 | L-cysteine desulfurase complex | 1 | 3.41E-02 |
|  | GO:0005905 | clathrin-coated pit            | 5 | 1.24E-02 |
|  | GO:0031105 | septin complex                 | 2 | 1.59E-02 |
|  | GO:0036157 | outer dynein arm               | 1 | 3.41E-02 |
